# Supplementary material for: Cardiovascular and renal outcomes among patients with type 2 diabetes using SGLT2 inhibitors added to metformin: a population-based cohort study from the UK
Source: HighWire-hosted journal article supplement (doi:10.1136/bmjdrc-2022-003072), 2023-01-01
Supplement: bmjdrc-2022-003072supp002_data_supplement.pdf [file bmjdrc-2022-003072supp002_data_supplement.pdf]

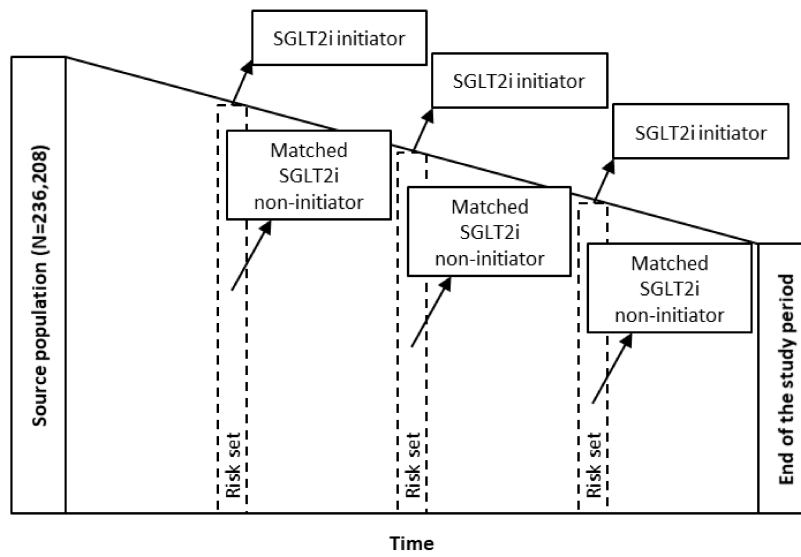

**Supplementary Figure 2.** Graphical description of matching procedure. SGLT2, sodium-glucose co-transporter-2 inhibitor
